# Supplementary material for: The Mitochondrion-Located Protein OsB12D1 Enhances Flooding Tolerance during Seed Germination and Early Seedling Growth in Rice
Source: MDPI journal article supplement (doi:10.3390/ijms150813461), 2014-07-31

## Supplementary Information

**Supplemental Dataset 1.** Multiple alignments of amino acid sequences of OsB12D1 and its closest homologs from 29 different plant species by MUSCLE software. (see the attached Supplemental Dataset 1 txt.)

**Table S1.** *Cis*-elements analysis based on the 1 kb promoters sequence upstream of the translation start point of the *OsB12Ds* using software of Place.

| Site Name   | Sequence   | Function                          | Position within the Gene Promoter |                      |               |                      |                      |               |
|-------------|------------|-----------------------------------|-----------------------------------|----------------------|---------------|----------------------|----------------------|---------------|
|             |            |                                   | Os03g40440                        | Os06g13680           | Os07g17310    | Os07g17330           | Os07g41340           | OsB12D1       |
| ABRE        | ACGTG      | abscisic acid<br>responsiveness   | (-)316 (+)326                     |                      |               | (-)784               | (+)356               | (+)48 (-)221  |
| ABRE        | MACGYGB    |                                   | (-)71                             | (+)165               | (+)192 (-)231 | (+)855 (+)865 (+)991 |                      | (-)194        |
| motif IIb   | CCGCCGCGCT |                                   | (-)344                            |                      |               |                      |                      |               |
| P-box       | CCTTTTG    | gibberellin-responsive<br>element |                                   | (-)722               |               | (-)525               |                      |               |
| P-box       | TTTTTCC    |                                   |                                   |                      |               |                      | (-)271               |               |
| GARE-motif  | (T)AACAGA  |                                   |                                   |                      |               | (-)720               |                      |               |
| TCA-element | CCATCTTTTT | salicylic acid<br>responsiveness  |                                   |                      | (+)424 (-)783 | (-)211 (-)236        |                      |               |
| GC-motif    | CCCCCG     | anoxic specific inducibility      |                                   | (-)318 (-)416 (-)370 |               | (+)739 (-)937        |                      |               |
| G-box       | CACGTG     | Stress responsiveness             |                                   |                      |               | (+)785               |                      | (+)195        |
| ARE         | TGGTTT     | anaerobic induction               |                                   | (+)786               |               | (+)479               | (+)671 (-)874 (+)984 | (-)303 (+)870 |

**Table S2.** Coexpression analysis of *OsB12D1* on the website of Rice Oligonucleotide Array Database.

| ID             | Positive<br>Coexpression | Binco | BinName                                                                                                   |
|----------------|--------------------------|-------|-----------------------------------------------------------------------------------------------------------|
| loc_os07g41340 | 0.7616                   | 33.99 | Development unspecified                                                                                   |
| loc_os03g12510 | 0.7084                   | 21.3  | Redox heme                                                                                                |
| loc_os02g39620 | 0.7077                   | 20.2  | Stress abiotic unspecified                                                                                |
| loc_os02g39620 | 0.7077                   | 20    | Stress                                                                                                    |
| loc_os01g67030 | 0.6991                   | 17.2  | Hormone metabolism auxin Induced regulated responsive activated                                           |
| loc_os06g49340 | 0.6936                   | 35.2  | Unknown                                                                                                   |
| loc_os03g13140 | 0.6848                   | 21.3  | Redox. Heme                                                                                               |
| loc_os01g67010 | 0.6848                   | 17.2  | Hormone metabolism auxin Induced regulated responsive activated                                           |
| loc_os03g08460 | 0.662                    | 27.3  | RNA regulation of transcription.AP2/EREBP,<br>APETALA2/Ethylene-responsive element binding protein family |
| loc_os12g38770 | 0.6604                   | 26.13 | Misc. Acid and other phosphatase                                                                          |
| loc_os06g09870 | 0.6591                   | 35.2  | Unknown                                                                                                   |
| loc_os03g25340 | 0.6551                   | 26.12 | Misc. peroxidase                                                                                          |
| loc_os11g47550 | 0.6496                   | 20.1  | Stress biotic                                                                                             |
| loc_os07g09630 | 0.6479                   | 26.7  | Misc. oxidases—copper, flavone                                                                            |
| loc_os09g29480 | 0.645                    | 13.1  | Amino acid metabolism synthesis serine-glycine- cysteine group cysteine                                   |
| loc_os08g40690 | 0.6449                   | 20.1  | Stress biotic                                                                                             |
| loc_os02g55890 | 0.642                    | 34.3  | Transport amino acids                                                                                     |
| loc_os03g45250 | 0.6357                   | 13.1  | Amino acid metabolism synthesis serine-glycine-cysteine group cysteine                                    |
| loc_os12g09540 | 0.6343                   | 23.1  | Nucleotide metabolism synthesis purine GAR Synthetase                                                     |
| loc_os11g10510 | 0.6339                   | 26.11 | Misc. alcohol dehydrogenases                                                                              |
| loc_os11g47560 | 0.6337                   | 20.1  | Stress biotic                                                                                             |
| loc_os01g20980 | 0.6331                   | 10.8  | Cell wall pectin esterases PME                                                                            |
| loc_os09g31040 | 0.6177                   | 30.3  | Signaling calcium                                                                                         |
| loc_os11g47610 | 0.6154                   | 20.1  | Stress biotic                                                                                             |
| loc_os03g25280 | 0.6128                   | 26.12 | Misc. Peroxidases                                                                                         |
| loc_os05g48040 | 0.6118                   | 34.99 | Transport misc                                                                                            |
| loc_os03g49524 | 0.6087                   | 26.2  | Misc UDP glucosyl and glucuronyl transferases                                                             |

**Table S3.** Primers used in this study.

| Primers          | Sequence (5'–3')     |
|------------------|----------------------|
| LOC_Os03g40440-F | GTTGGCATCGGGCATGGTGT |
| LOC_Os03g40440-R | GGAGAAGAAGCGGTTGATGG |
| LOC_Os06g13680-F | CAGCTCTTCCGCAACATCAC |
| LOC_Os06g13680-R | TGATCTCAGGGGTCTTGTCG |
| LOC_Os07g17310-F | TGAGGTGTACCCGCTGTTCG |
| LOC_Os07g17310-R | CAGAACCTCCTCACGCCAT  |
| LOC_Os07g17330-F | AGGTGTACCCGCTCTTCCTC |
| LOC_Os07g17330-R | GAACCTCCTGAAGCCGTGCT |
| LOC_Os07g41340-F | CCGCCATGACCTTCGTCAC  |
| LOC_Os07g41340-R | TGGTACTTCTCACCTCCTC  |
| OsB12D1-F        | GTGGGAGGGATGTGCGTGTT |
| OsB12D1-R        | TCGGAAGGCGTGGTGGTGAT |

**Table S3. Cont.**

| Primers   | Sequence (5'-3')                              |
|-----------|-----------------------------------------------|
| 18S-F     | ACGAACAACCTGCGAAAGC                           |
| 18S-R     | CGGCATCGTTTATGGTTG                            |
| Sub-F     | ATCTAGAATGGGCCGTTGGGTGAAGCCA ( <i>Xba</i> I)  |
| Sub-R     | CCTCTAGAGTTTTGACGGTCACTCTTGG ( <i>Xba</i> I)  |
| OE-F      | AAGGTACCATGGGCCGTTGGGTGAAG ( <i>Bam</i> HI)   |
| OE-R      | AGGGATCCGTTTTGACGGTCACTCTTGG ( <i>Eco</i> RI) |
| Cyt1-F:   | CGACCGTTTCCCACAACCCT                          |
| Cyt1-R:   | CATGGCTATGGCACCACCAGG                         |
| OsHb2-F:  | ACGAGGTTTCGCGCTGCTTGA                         |
| OsHb2-R:  | GGCTTCATCTCCTGCTTGATGG                        |
| OsNAS3-F: | CTGTTACAGGAGCTGGTGATG                         |
| OsNAS3-R: | GGCGAGCTGGATGTAGTTGTTG                        |

**Figure S1.** Seeds germination of *OsB12D1-OE* lines under normal condition.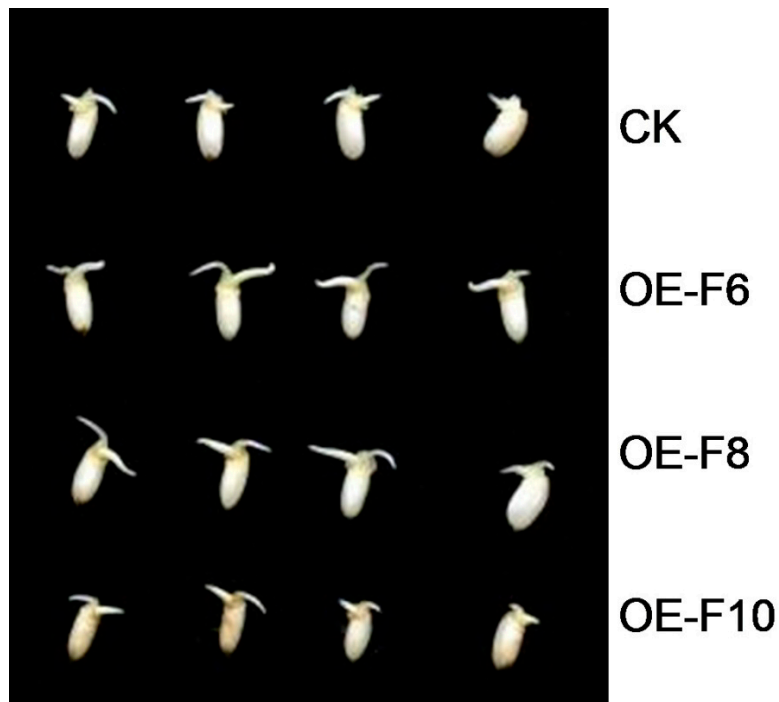

**Figure S2.** Ten-days-old seedlings of *OsB12D1-OE* lines under flooding. The arrows indicated the leaves emergency from the 8 cm deep of water. WT, Zhonghua11; OE-F6 and OE-F8, transgenic lines.

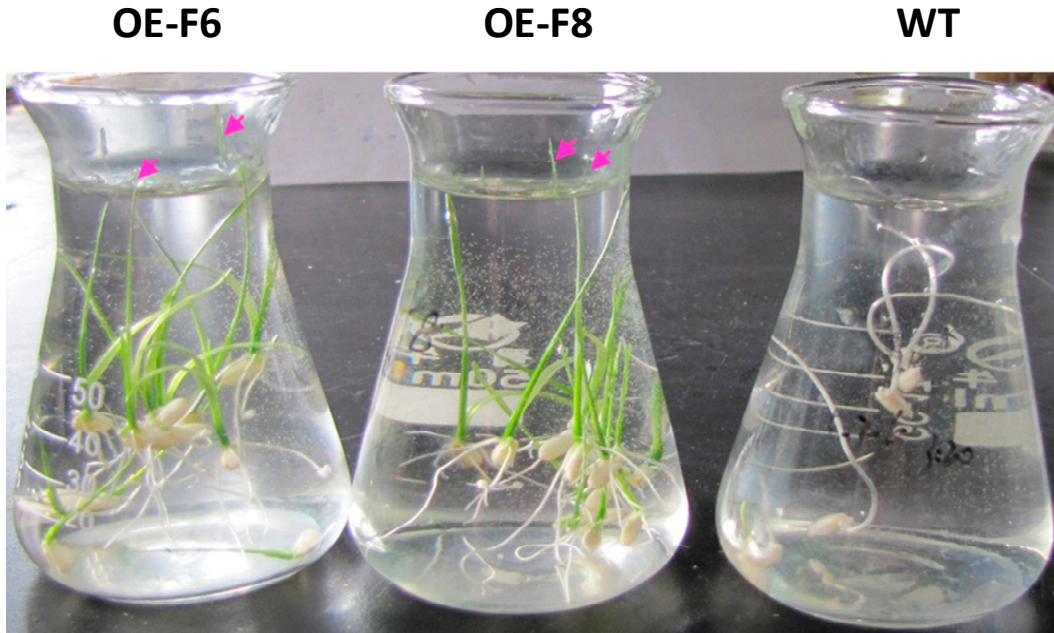

**Figure S3.** Five-days-old seedlings of *OsB12D1-OE* lines under flooding containing GA and ethylene biosynthesis inhibitors. PBZ, 200uM paclobutrazol, the GA biosynthesis inhibitor;  $\text{CoCl}_2$ , 60uM  $\text{CoCl}_2$ , ethylene biosynthesis inhibitor; WT, Zhonghua11; OE-F6 and OE-F8, transgenic lines.

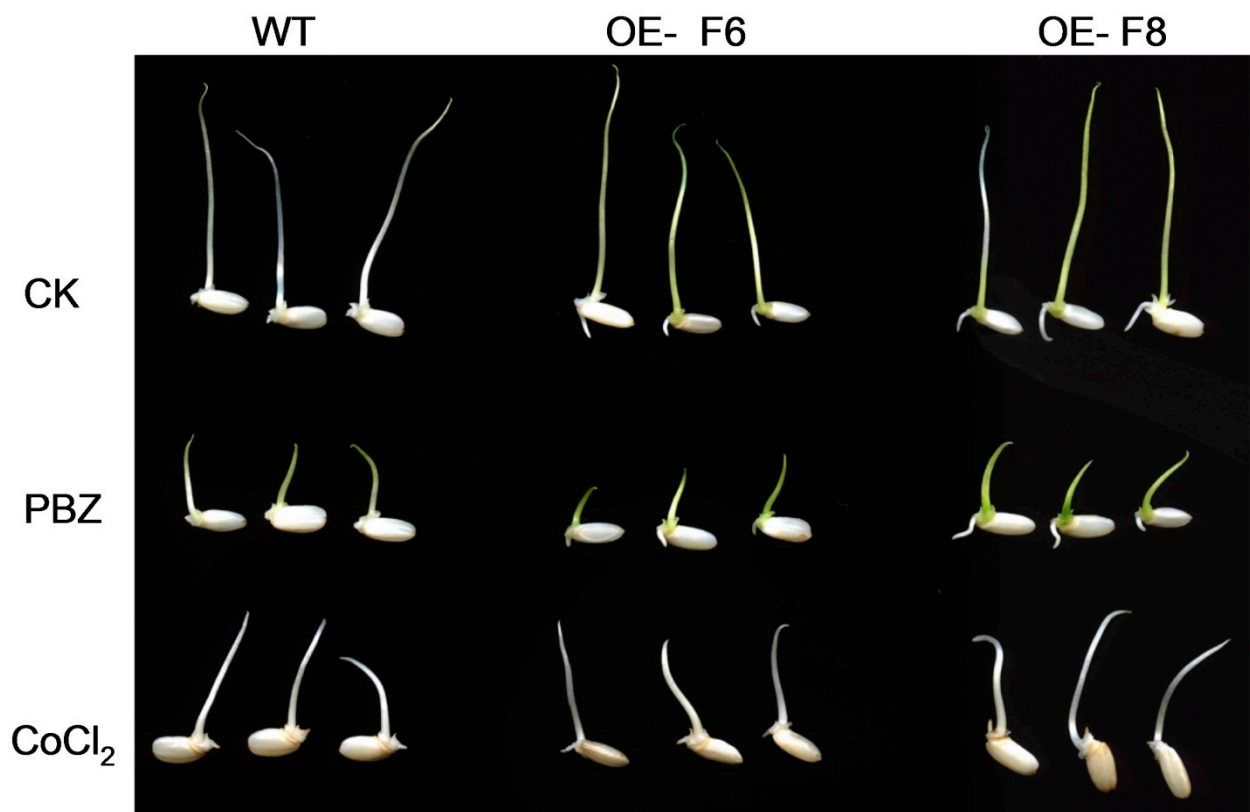

Supplement: s1 [file s1]
